# Supplementary material for: Brain region-specific altered expression and association of mitochondria-related genes in autism
Source: PubMed Central journal article supplement (PMC3528421; doi:10.1186/2040-2392-3-12), 2012-11-01
Supplement: 2040-2392-3-12-S1.pdf [file 2040-2392-3-12-S1.pdf]

**Demographic characteristics of postmortem brain samples**

| Brain region | Age (years; mean $\pm$ SD) |                  |                      | Postmortem interval (hours; mean $\pm$ SD) |                   |                      | Gender  |        |                      |
|--------------|----------------------------|------------------|----------------------|--------------------------------------------|-------------------|----------------------|---------|--------|----------------------|
|              | Control                    | Autism           | p-value <sup>1</sup> | Control                                    | Autism            | p-value <sup>1</sup> | Control | Autism | p-value <sup>2</sup> |
| ACG          | 13.40 $\pm$ 4.45           | 16.38 $\pm$ 8.33 | 0.345                | 15.60 $\pm$ 6.20                           | 18.02 $\pm$ 14.52 | 0.643                | 6M, 4F  | 6M, 2F | 0.638                |
| MC           | 15.63 $\pm$ 6.74           | 17.43 $\pm$ 8.40 | 0.652                | 18.13 $\pm$ 2.90                           | 18.86 $\pm$ 15.71 | 0.899                | 5M, 3F  | 5M, 2F | 0.573                |
| THL          | 15.56 $\pm$ 6.31           | 16.38 $\pm$ 8.33 | 0.821                | 17.44 $\pm$ 3.40                           | 18.02 $\pm$ 14.52 | 0.909                | 6M, 3F  | 6M, 2F | 0.563                |

<sup>1</sup>t-test

<sup>2</sup>Fisher's exact test

ACG: Anterior cingulate gyrus; MC: Motor cortex; THL: Thalamus

M: Male; F: Female
