# Supplementary material for: Brain region-specific altered expression and association of mitochondria-related genes in autism
Source: PubMed Central journal article supplement (PMC3528421; doi:10.1186/2040-2392-3-12), 2012-11-01
Supplement: 2040-2392-3-12-S5.pdf [file 2040-2392-3-12-S5.pdf]

### 5.1: FBAT analysis of *NEFL* in Japanese family samples

| Marker    | Location   | Allele <sup>1</sup> | Families <sup>2</sup> | Frequency | Z-score <sup>3</sup> | p-value |
|-----------|------------|---------------------|-----------------------|-----------|----------------------|---------|
| rs1059111 | Exon 4 UTR | A                   | 128                   | 0.632     | 1.470                | 0.141   |
|           |            | T                   |                       | 0.368     | -1.470               |         |

<sup>1</sup> Major allele is listed first

<sup>2</sup> No. of informative families used by FBAT

<sup>3</sup> Positive score indicates the risk allele; negative score indicates the protective allele

UTR: Untranslated region

## 5.2: FBAT analysis of *SLC25A27* in AGRE family samples

| Marker     | Location | Allele <sup>1</sup> | Families <sup>2</sup> | Frequency | Z-score <sup>3</sup> | p-value |
|------------|----------|---------------------|-----------------------|-----------|----------------------|---------|
| rs12192544 | 5'       | C                   | 472                   | 0.776     | 0.434                | 0.664   |
|            |          | G                   |                       | 0.224     | -0.434               |         |
| rs3757241  | Exon 2   | C                   | 410                   | 0.821     | 1.179                | 0.238   |
|            |          | T                   |                       | 0.179     | -1.179               |         |
| rs953062   | Intron 2 | A                   | 592                   | 0.642     | -0.769               | 0.442   |
|            |          | G                   |                       | 0.358     | 0.769                |         |
| rs9296505  | Intron 3 | A                   | 628                   | 0.530     | 0.186                | 0.853   |
|            |          | G                   |                       | 0.470     | -0.186               |         |
| rs10498770 | Intron 8 | C                   | 235                   | 0.901     | 1.509                | 0.131   |
|            |          | G                   |                       | 0.099     | -1.509               |         |

<sup>1</sup> Major allele is listed first

<sup>2</sup> No. of informative families used by FBAT

<sup>3</sup> Positive score indicates the risk allele; negative score indicates the protective allele

### 5.3: FBAT analysis of *MTX2* in AGRE family samples

| Marker     | Location  | Allele <sup>1</sup> | Families <sup>2</sup> | Frequency | Z-score <sup>3</sup> | p-value |
|------------|-----------|---------------------|-----------------------|-----------|----------------------|---------|
| rs6720043  | Intron 2  | A                   | 478                   | 0.752     | 0.741                | 0.458   |
|            |           | G                   | 478                   | 0.248     | -0.741               |         |
| rs1403996  | Intron 2  | A                   | 497                   | 0.722     | -0.866               | 0.386   |
|            |           | G                   | 497                   | 0.278     | 0.866                |         |
| rs17806377 | Intron 2  | T                   | 547                   | 0.728     | 0.784                | 0.433   |
|            |           | A                   | 547                   | 0.272     | -0.784               |         |
| rs6748172  | Intron 4  | G                   | 404                   | 0.826     | 1.113                | 0.265   |
|            |           | A                   | 404                   | 0.174     | -1.113               |         |
| rs2103108  | Intron 10 | C                   | 600                   | 0.584     | -0.508               | 0.612   |
|            |           | G                   | 600                   | 0.416     | 0.508                |         |

<sup>1</sup> Major allele is listed first

<sup>2</sup> No. of informative families used by FBAT

<sup>3</sup> Positive score indicates the risk allele; negative score indicates the protective allele

#### 5.4: FBAT analysis of *MTX2* in Japanese family samples

| Marker     | Location  | Allele <sup>1</sup> | Families <sup>2</sup> | Frequency | Z-score <sup>3</sup> | p-value |
|------------|-----------|---------------------|-----------------------|-----------|----------------------|---------|
| rs6709357  | Intron 2  | T                   | 110                   | 0.779     | -1.209               | 0.226   |
|            |           | C                   |                       | 0.221     | 1.209                |         |
| rs17806377 | Intron 2  | T                   | 89                    | 0.849     | 1.675                | 0.094   |
|            |           | A                   |                       | 0.151     | -1.675               |         |
| rs6433582  | Intron 4  | T                   | 111                   | 0.778     | -1.119               | 0.263   |
|            |           | G                   |                       | 0.222     | 1.119                |         |
| rs1403993  | Intron 10 | G                   | 126                   | 0.538     | -0.077               | 0.939   |
|            |           | A                   |                       | 0.462     | 0.077                |         |

<sup>1</sup> Major allele is listed first

<sup>2</sup> No. of informative families used by FBAT

<sup>3</sup> Positive score indicates the risk allele; negative score indicates the protective allele
