# Supplementary material for: Brain region-specific altered expression and association of mitochondria-related genes in autism
Source: Mol Autism. 2012 Nov 1;3:12. doi: 10.1186/2040-2392-3-12 (PMC3528421; doi:10.1186/2040-2392-3-12)
Supplement: Additional file 3 — Human Mitochondria RT2ProfilerTMPCR Array: Functional Gene Groupings. Classification of genes according to their functions. [file 2040-2392-3-12-S3.xls]

## Sheet: Sheet1
Human Mitochondria RT2 ProfilerTM PCR Array: Functional Gene Groupings
Function	Genes
Membrane Polarization & Potential	BAK1, BCL2, BCL2L1, BNIP3, SOD1, TP53, UCP1, UCP2, UCP3
Mitochondrial Transport	AIP, BAK1, BCL2, BCL2L1, BNIP3, CPT1B, CPT2, DNAJC19, FXC1 (TIMM10B), GRPEL1, HSP90AA1, HSPD1, IMMP2L, MFN2, MIPEP, MTX2, STARD3, TP53, TSPO, UCP1, UCP2, UCP3
Small Molecule Transport	SLC25A1, SLC25A10, SLC25A12, SLC25A13, SLC25A14, SLC25A15, SLC25A16, SLC25A17, SLC25A19, SLC25A2, SLC25A20, SLC25A21, SLC25A22, SLC25A23, SLC25A24, SLC25A25, SLC25A27, SLC25A3, SLC25A30, SLC25A31, SLC25A37, SLC25A4, SLC25A5
Targeting Proteins to Mitochondria	AIP, DNAJC19, FXC1 (TIMM10B), GRPEL1, HSPD1, IMMP2L, MFN2, MIPEP, TSPO
Mitochondrion Protein Import	AIP, COX10, COX18, DNAJC19, FXC1 (TIMM10B), GRPEL1, HSPD1, MIPEP, SH3GLB1
Outer Membrane Translocation	TOMM20, TOMM22, TOMM34, TOMM40, TOMM40L, TOMM70A
Inner Membrane Translocation	FXC1 (TIMM10B), IMMP1L, IMMP2L, OPA1, TAZ, TIMM10, TIMM17A, TIMM17B, TIMM22, TIMM23, TIMM44, TIMM50, TIMM8A, TIMM8B, TIMM9
Mitochondrial Fission & Fusion	COX10, COX18, FIS1, MFN1, MFN2, OPA1
Mitochondrial Localization	DNM1L, LRPPRC, MFN2, MSTO1, NEFL, OPA1, RHOT1, RHOT2, UXT
Apoptotic Genes	AIFM2, BAK1, BBC3, BCL2, BCL2L1, BID, BNIP3, CDKN2A, DNM1L, PMAIP1, SFN, SH3GLB1, SOD2, TP53
