# Supplementary material for: Brain region-specific altered expression and association of mitochondria-related genes in autism
Source: Mol Autism. 2012 Nov 1;3:12. doi: 10.1186/2040-2392-3-12 (PMC3528421; doi:10.1186/2040-2392-3-12)
Supplement: Additional file 4 — SNPs selected for the genetic association study. [file 2040-2392-3-12-S4.pdf]

**SNPs selected for the genetic association study**

| <b>Gene</b> | <i><b>MTX2</b></i> |                 | <i><b>NEFL</b></i> |                 | <i><b>SLC25A27</b></i> |                 |
|-------------|--------------------|-----------------|--------------------|-----------------|------------------------|-----------------|
|             | <b>AGRE</b>        | <b>Japanese</b> | <b>AGRE</b>        | <b>Japanese</b> | <b>AGRE</b>            | <b>Japanese</b> |
| <b>SNPs</b> | rs6720043          | rs6709357       | rs2979704          | rs1059111       | rs12192544             | rs12192544      |
|             | rs1403996          | rs17806377      | rs3761             |                 | rs3757241              | rs9381469       |
|             | rs17806377         | rs6433582       | rs2979687          |                 | rs953062               | rs6901132       |
|             | rs6748172          | rs1403993       |                    |                 | rs9296505              | rs6901178       |
|             | rs2103108          |                 |                    |                 | rs10498770             | rs2270450       |
